# Supplementary material for: Camellia (Camellia oleifera bel.) seed oil reprograms gut microbiota and alleviates lipid accumulation in high fat-fed mice through the mTOR pathway
Source: Royal Society of Chemistry journal article supplement (doi:10.1039/d1fo04075h), 2022-01-01
Supplement: d1fo04075h1.pdf [file d1fo04075h1.pdf]

|                         | Maker Cont1 HFD1 CO1                                                                | Maker Cont2 HFD2 CO2                                                                | Maker Cont3 HFD3 CO3                                                                  |
|-------------------------|-------------------------------------------------------------------------------------|-------------------------------------------------------------------------------------|---------------------------------------------------------------------------------------|
| $\beta$ -actin<br>42 KD |    |    |    |
| SEBP1<br>122 KD         |    |    |    |
| SEBP2<br>125 KD         |    |    |    |
| Insig1<br>33 KD         |    |    |    |
| Insig2<br>33 KD         |    |    |    |
| SCAP<br>140 KD          |   |   |   |
| LXR $\alpha$<br>45 KD   |  |  |  |
| LXR $\beta$<br>50 KD    |  |  |  |
| PPAR $\alpha$<br>51 KD  |  |  |  |
| PPAR<br>32 KD           |  |  |  |
| mTOR<br>289 KD          |  |  |  |
| RpS6KB1<br>289 KD       |  |  |  |
